# Supplementary material for: Effects of Supplementing Tributyrin on Meat Quality Characteristics of Foreshank Muscle of Weaned Small-Tailed Han Sheep Lambs
Source: MDPI journal article supplement (doi:10.3390/ani14081235), 2024-04-19
Supplement: s1 [file s1]

**Table S1.** The effects of tributyrin on amino acids (AAs) content in foreshank muscle of Small-Tailed Han lambs

| Items                                      | Tributyrin additions, g/kg DM basis |                    |                    |                    |                    | SEM   | <i>p</i> -values <sup>1</sup> |         |           |
|--------------------------------------------|-------------------------------------|--------------------|--------------------|--------------------|--------------------|-------|-------------------------------|---------|-----------|
|                                            | 0                                   | 0.5                | 1.0                | 2.0                | 4.0                |       | Contrast                      | Linear  | Quadratic |
| $\Sigma$ EAAs ( g/100 g foreshank muscle)  | 6.61 <sup>b</sup>                   | 7.82 <sup>a</sup>  | 8.13 <sup>a</sup>  | 7.84 <sup>a</sup>  | 7.92 <sup>a</sup>  | 0.220 | < 0.001                       | < 0.001 | 0.706     |
| Valine                                     | 0.93 <sup>c</sup>                   | 0.98 <sup>b</sup>  | 0.97 <sup>b</sup>  | 1.05 <sup>a</sup>  | 1.00 <sup>b</sup>  | 0.014 | < 0.001                       | < 0.001 | 0.006     |
| Methionine                                 | 0.30 <sup>b</sup>                   | 0.40 <sup>a</sup>  | 0.43 <sup>a</sup>  | 0.36 <sup>ab</sup> | 0.37 <sup>a</sup>  | 0.022 | < 0.001                       | 0.170   | 0.399     |
| Isoleucine                                 | 0.86 <sup>b</sup>                   | 0.95 <sup>a</sup>  | 0.97 <sup>a</sup>  | 0.93 <sup>a</sup>  | 0.94 <sup>a</sup>  | 0.014 | < 0.001                       | 0.003   | 0.406     |
| Leucine                                    | 1.28 <sup>c</sup>                   | 1.40 <sup>c</sup>  | 1.63 <sup>b</sup>  | 1.93 <sup>a</sup>  | 1.86 <sup>a</sup>  | 0.067 | < 0.001                       | < 0.001 | 0.493     |
| Phenylalanine                              | 0.85 <sup>b</sup>                   | 1.15 <sup>a</sup>  | 1.16 <sup>a</sup>  | 0.96 <sup>ab</sup> | 1.01 <sup>ab</sup> | 0.065 | 0.004                         | 0.492   | 0.487     |
| Lysine                                     | 1.49 <sup>b</sup>                   | 2.01 <sup>a</sup>  | 2.05 <sup>a</sup>  | 1.68 <sup>ab</sup> | 1.78 <sup>ab</sup> | 0.115 | 0.014                         | 0.512   | 0.047     |
| Threonine                                  | 0.89                                | 0.91               | 0.92               | 0.90               | 0.93               | 0.015 | 0.188                         | 0.183   | 0.440     |
| $\Sigma$ NEAAs ( g/100 g foreshank muscle) | 9.47 <sup>c</sup>                   | 10.01 <sup>b</sup> | 10.36 <sup>a</sup> | 10.41 <sup>a</sup> | 10.39 <sup>a</sup> | 0.084 | < 0.001                       | < 0.001 | 0.646     |
| Serine                                     | 0.71 <sup>b</sup>                   | 0.75 <sup>a</sup>  | 0.75 <sup>a</sup>  | 0.74 <sup>a</sup>  | 0.75 <sup>a</sup>  | 0.011 | 0.001                         | 0.025   | 0.763     |

|                                          |                   |                    |                    |                    |                    |       |         |         |       |
|------------------------------------------|-------------------|--------------------|--------------------|--------------------|--------------------|-------|---------|---------|-------|
| Proline                                  | 0.79 <sup>c</sup> | 0.83 <sup>b</sup>  | 0.82 <sup>bc</sup> | 0.91 <sup>a</sup>  | 0.88 <sup>a</sup>  | 0.014 | < 0.001 | < 0.001 | 0.006 |
| Glutamic acid                            | 2.22 <sup>b</sup> | 2.29 <sup>b</sup>  | 2.40 <sup>ab</sup> | 2.55 <sup>a</sup>  | 2.50 <sup>a</sup>  | 0.061 | 0.002   | < 0.001 | 0.620 |
| Glycine                                  | 0.96              | 0.97               | 0.98               | 1.02               | 1.01               | 0.035 | 0.397   | 0.207   | 0.780 |
| Histidine                                | 0.55 <sup>b</sup> | 0.68 <sup>a</sup>  | 0.72 <sup>a</sup>  | 0.64 <sup>a</sup>  | 0.71 <sup>a</sup>  | 0.028 | < 0.001 | 0.003   | 0.274 |
| Alanine                                  | 1.09              | 1.13               | 1.16               | 1.10               | 1.10               | 0.021 | 0.280   | 0.679   | 0.194 |
| Arginine                                 | 1.14 <sup>c</sup> | 1.27 <sup>b</sup>  | 1.37 <sup>a</sup>  | 1.22 <sup>bc</sup> | 1.25 <sup>b</sup>  | 0.031 | < 0.001 | 0.106   | 0.024 |
| Aspartic acid                            | 1.98 <sup>c</sup> | 2.06 <sup>b</sup>  | 2.23 <sup>a</sup>  | 2.20 <sup>a</sup>  | 2.06 <sup>b</sup>  | 0.022 | < 0.001 | < 0.001 | 0.051 |
| $\Sigma$ AAs (g/100g)                    | 16.0 <sup>b</sup> | 17.8 <sup>a</sup>  | 18.4 <sup>a</sup>  | 18.2 <sup>a</sup>  | 18.3 <sup>a</sup>  | 0.25  | < 0.001 | < 0.001 | 0.628 |
| Branched-chain AAs <sup>2</sup> (g/100g) | 3.07 <sup>d</sup> | 3.33 <sup>c</sup>  | 3.58 <sup>b</sup>  | 3.92 <sup>a</sup>  | 3.81 <sup>a</sup>  | 0.076 | < 0.001 | < 0.001 | 0.331 |
| Umami AAs <sup>3</sup> (UAAs, g/100g)    | 4.20 <sup>d</sup> | 4.35 <sup>cd</sup> | 4.52 <sup>bc</sup> | 4.76 <sup>a</sup>  | 4.66 <sup>ab</sup> | 0.067 | < 0.001 | < 0.001 | 0.473 |
| Sweet AAs <sup>4</sup> (SAAs, g/100g)    | 4.46 <sup>c</sup> | 4.60 <sup>b</sup>  | 4.66 <sup>ab</sup> | 4.69 <sup>a</sup>  | 4.68 <sup>a</sup>  | 0.022 | < 0.001 | < 0.001 | 0.771 |
| EAA/ $\Sigma$ AAs                        | 0.41 <sup>b</sup> | 0.43 <sup>a</sup>  | 0.43 <sup>a</sup>  | 0.42 <sup>ab</sup> | 0.43 <sup>a</sup>  | 0.006 | 0.003   | 0.130   | 0.812 |
| EAA/ $\Sigma$ EAA                        | 0.69 <sup>b</sup> | 0.78 <sup>a</sup>  | 0.78 <sup>a</sup>  | 0.75 <sup>ab</sup> | 0.76 <sup>a</sup>  | 0.021 | 0.003   | 0.137   | 0.855 |

|                   |                   |                   |                   |                   |                   |       |         |         |       |
|-------------------|-------------------|-------------------|-------------------|-------------------|-------------------|-------|---------|---------|-------|
| UAA/ $\Sigma$ AAs | 0.26              | 0.24              | 0.24              | 0.26              | 0.25              | 0.005 | 0.077   | 0.821   | 0.361 |
| SAA/ $\Sigma$ AAs | 0.27 <sup>a</sup> | 0.25 <sup>b</sup> | 0.25 <sup>b</sup> | 0.25 <sup>b</sup> | 0.25 <sup>b</sup> | 0.003 | < 0.001 | < 0.001 | 0.599 |

DM = dry matter; EAAs = essential amino acids; NEAAs = non-essential amino acids; SEM = standard error of the mean.

<sup>a-d</sup> Values within a row with no common superscripts differ significantly ( $p < 0.05$ ).

<sup>1</sup> Linear, linear effect of tributyrin; Quadratic, quadratic effect of tributyrin.

<sup>2</sup> Branched-chain amino acids including valine, isoleucine and leucine.

<sup>3</sup> Umami amino acids including both glutamic acid and aspartic acid.

<sup>4</sup> Sweet amino acids including threonine, serine, glycine, alanine and proline.

**Table S2.** The effects of tributyrin on fatty acid content in foreshank muscle of Small-Tailed Han lambs

| Items                                     | Tributyrin additions, g/kg DM basis |                     |                     |                    |                    | SEM   | <i>p</i> -values <sup>1</sup> |         |           |
|-------------------------------------------|-------------------------------------|---------------------|---------------------|--------------------|--------------------|-------|-------------------------------|---------|-----------|
|                                           | 0                                   | 0.5                 | 1.0                 | 2.0                | 4.0                |       | Contrast                      | Linear  | Quadratic |
| $\Sigma$ SFAs (mg/100 g foreshank muscle) | 2,010 <sup>c</sup>                  | 2,083 <sup>bc</sup> | 2,101 <sup>bc</sup> | 2,136 <sup>b</sup> | 2,405 <sup>a</sup> | 34.9  | < 0.001                       | < 0.001 | 0.610     |
| C4:0                                      | 4.57 <sup>bc</sup>                  | 4.88 <sup>b</sup>   | 4.19 <sup>c</sup>   | 4.58 <sup>bc</sup> | 5.50 <sup>a</sup>  | 0.191 | 0.304                         | 0.012   | 0.105     |
| C10:0                                     | 6.78 <sup>c</sup>                   | 6.58 <sup>c</sup>   | 7.53 <sup>ab</sup>  | 7.21 <sup>bc</sup> | 8.12 <sup>a</sup>  | 0.240 | 0.036                         | < 0.001 | 0.017     |
| C12:0                                     | 7.12 <sup>b</sup>                   | 6.81 <sup>c</sup>   | 7.06 <sup>bc</sup>  | 7.31 <sup>b</sup>  | 8.23 <sup>a</sup>  | 0.10  | 0.044                         | < 0.001 | 0.155     |
| C13:0                                     | 10.6 <sup>c</sup>                   | 12.2 <sup>c</sup>   | 16.3 <sup>b</sup>   | 17.3 <sup>b</sup>  | 21.5 <sup>a</sup>  | 0.98  | < 0.001                       | < 0.001 | 0.139     |
| C14:0                                     | 106 <sup>c</sup>                    | 111 <sup>c</sup>    | 122 <sup>ab</sup>   | 120 <sup>b</sup>   | 130 <sup>a</sup>   | 3.14  | < 0.001                       | < 0.001 | 0.096     |
| C15:0                                     | 14.7 <sup>d</sup>                   | 16.0 <sup>c</sup>   | 18.2 <sup>a</sup>   | 17.1 <sup>b</sup>  | 18.8 <sup>a</sup>  | 0.29  | < 0.001                       | < 0.001 | < 0.001   |
| C16:0                                     | 1,043 <sup>c</sup>                  | 1,060 <sup>bc</sup> | 1,073 <sup>bc</sup> | 1,106 <sup>b</sup> | 1,174 <sup>a</sup> | 15.5  | 0.001                         | < 0.001 | 0.940     |
| C17:0                                     | 42.0 <sup>c</sup>                   | 43.5 <sup>bc</sup>  | 44.4 <sup>ab</sup>  | 44.8 <sup>ab</sup> | 46.3 <sup>a</sup>  | 0.69  | 0.001                         | < 0.001 | 0.803     |
| C18:0                                     | 699 <sup>b</sup>                    | 741 <sup>b</sup>    | 734 <sup>b</sup>    | 740 <sup>b</sup>   | 903 <sup>a</sup>   | 30.6  | 0.022                         | < 0.001 | 0.760     |

|                                           |                    |                    |                    |                    |                    |       |         |         |       |
|-------------------------------------------|--------------------|--------------------|--------------------|--------------------|--------------------|-------|---------|---------|-------|
| C20:0                                     | 2.84 <sup>b</sup>  | 2.54 <sup>b</sup>  | 2.52 <sup>b</sup>  | 2.82 <sup>b</sup>  | 3.57 <sup>a</sup>  | 0.145 | 0.899   | < 0.001 | 0.961 |
| C21:0                                     | 15.1 <sup>b</sup>  | 14.4 <sup>bc</sup> | 13.4 <sup>c</sup>  | 14.2 <sup>bc</sup> | 17.2 <sup>a</sup>  | 0.51  | 0.565   | 0.017   | 0.659 |
| C22:0                                     | 5.00 <sup>b</sup>  | 5.10 <sup>b</sup>  | 4.59 <sup>b</sup>  | 4.67 <sup>b</sup>  | 6.43 <sup>a</sup>  | 0.275 | 0.527   | 0.007   | 0.969 |
| C23:0                                     | 51.4 <sup>bc</sup> | 56.5 <sup>ab</sup> | 53.0 <sup>bc</sup> | 48.3 <sup>c</sup>  | 61.1 <sup>a</sup>  | 1.76  | 0.103   | 0.052   | 0.443 |
| $\Sigma$ UFAs (mg/100 g foreshank muscle) | 2,430 <sup>a</sup> | 2,121 <sup>b</sup> | 2,042 <sup>b</sup> | 1,819 <sup>c</sup> | 1,632 <sup>d</sup> | 65.6  | < 0.001 | < 0.001 | 0.318 |
| C14:1                                     | 8.74 <sup>ab</sup> | 10.1 <sup>a</sup>  | 6.89 <sup>b</sup>  | 10.1 <sup>a</sup>  | 5.99 <sup>b</sup>  | 0.938 | 0.668   | 0.068   | 0.002 |
| C15:1                                     | 17.1 <sup>a</sup>  | 10.5 <sup>b</sup>  | 11.6 <sup>b</sup>  | 12.3 <sup>b</sup>  | 7.5 <sup>b</sup>   | 1.66  | < 0.001 | 0.002   | 0.829 |
| C16:1                                     | 87.2 <sup>a</sup>  | 88.0 <sup>a</sup>  | 78.1 <sup>b</sup>  | 74.2 <sup>b</sup>  | 71.5 <sup>b</sup>  | 2.31  | < 0.001 | < 0.001 | 0.286 |
| C17:1                                     | 38.3 <sup>a</sup>  | 32.9 <sup>bc</sup> | 34.9 <sup>ab</sup> | 32.9 <sup>bc</sup> | 30.1 <sup>c</sup>  | 1.25  | < 0.001 | < 0.001 | 0.166 |
| C20:1n9                                   | 6.27 <sup>a</sup>  | 6.29 <sup>a</sup>  | 5.30 <sup>b</sup>  | 4.43 <sup>b</sup>  | 2.57 <sup>c</sup>  | 0.309 | < 0.001 | < 0.001 | 0.391 |
| C18:1n9t                                  | 208 <sup>a</sup>   | 197 <sup>ab</sup>  | 173 <sup>b</sup>   | 182 <sup>b</sup>   | 126 <sup>c</sup>   | 8.19  | < 0.001 | < 0.001 | 0.037 |
| C18:1n9c                                  | 1,774 <sup>a</sup> | 1,489 <sup>b</sup> | 1,478 <sup>b</sup> | 1,264 <sup>c</sup> | 1,169 <sup>c</sup> | 65.9  | < 0.001 | < 0.001 | 0.153 |
| C18:2n6t                                  | 18.5 <sup>a</sup>  | 16.0 <sup>ab</sup> | 11.8 <sup>c</sup>  | 14.4 <sup>bc</sup> | 9.1 <sup>d</sup>   | 1.04  | < 0.001 | < 0.001 | 0.010 |

|                                                |                    |                    |                    |                    |                    |       |         |         |       |
|------------------------------------------------|--------------------|--------------------|--------------------|--------------------|--------------------|-------|---------|---------|-------|
| C18:2n6c                                       | 228 <sup>a</sup>   | 226 <sup>a</sup>   | 201 <sup>ab</sup>  | 185 <sup>b</sup>   | 187 <sup>b</sup>   | 9.4   | 0.008   | < 0.001 | 0.748 |
| C18:3n3                                        | 11.1 <sup>a</sup>  | 10.8 <sup>ab</sup> | 8.53 <sup>bc</sup> | 7.91 <sup>c</sup>  | 5.00 <sup>d</sup>  | 0.817 | 0.002   | < 0.001 | 0.262 |
| C18:3n6                                        | 4.31               | 3.78               | 5.04               | 6.14               | 3.32               | 0.223 | 0.308   | 0.599   | 0.346 |
| C20:2                                          | 4.22               | 5.83               | 7.52               | 4.98               | 3.22               | 0.857 | 0.227   | 0.296   | 0.200 |
| C20:3n6                                        | 5.03 <sup>a</sup>  | 4.71 <sup>a</sup>  | 2.81 <sup>b</sup>  | 1.77 <sup>b</sup>  | 1.46 <sup>b</sup>  | 0.557 | < 0.001 | < 0.001 | 0.580 |
| C20:5n3                                        | 3.65 <sup>a</sup>  | 3.68 <sup>a</sup>  | 2.87 <sup>a</sup>  | 2.89 <sup>a</sup>  | 1.80 <sup>b</sup>  | 0.327 | 0.025   | 0.007   | 0.214 |
| C24:1                                          | 6.15 <sup>b</sup>  | 9.93 <sup>a</sup>  | 8.51 <sup>ab</sup> | 7.28 <sup>b</sup>  | 3.41 <sup>c</sup>  | 0.800 | 0.212   | 0.002   | 0.222 |
| C22:6n3                                        | 8.12 <sup>a</sup>  | 6.16 <sup>ab</sup> | 5.11 <sup>b</sup>  | 6.07 <sup>ab</sup> | 4.42 <sup>b</sup>  | 0.724 | 0.001   | 0.002   | 0.346 |
| MUFAs <sup>2</sup> (mg/100 g foreshank muscle) | 2,146 <sup>a</sup> | 1,844 <sup>b</sup> | 1,796 <sup>b</sup> | 1,588 <sup>c</sup> | 1,417 <sup>c</sup> | 64.1  | < 0.001 | < 0.001 | 0.258 |
| PUFAs <sup>3</sup> (mg/100 g foreshank muscle) | 283 <sup>a</sup>   | 277 <sup>a</sup>   | 245 <sup>b</sup>   | 230 <sup>bc</sup>  | 215 <sup>c</sup>   | 9.3   | < 0.001 | < 0.001 | 0.441 |
| MUFA/SFA                                       | 1.07 <sup>a</sup>  | 0.88 <sup>b</sup>  | 0.85 <sup>b</sup>  | 0.74 <sup>c</sup>  | 0.58 <sup>d</sup>  | 0.03  | < 0.001 | < 0.001 | 0.272 |
| PUFA/SFA                                       | 0.14 <sup>a</sup>  | 0.13 <sup>a</sup>  | 0.11 <sup>b</sup>  | 0.10 <sup>b</sup>  | 0.08 <sup>c</sup>  | 0.004 | < 0.001 | < 0.001 | 0.385 |
| Σn3 (mg/100 g foreshank muscle)                | 22.8 <sup>a</sup>  | 19.9 <sup>b</sup>  | 16.5 <sup>c</sup>  | 17.6 <sup>bc</sup> | 11.2 <sup>d</sup>  | 0.93  | < 0.001 | < 0.001 | 0.034 |

|                                         |                   |                   |                   |                   |                   |       |         |         |       |
|-----------------------------------------|-------------------|-------------------|-------------------|-------------------|-------------------|-------|---------|---------|-------|
| $\Sigma$ n6 (mg/100 g foreshank muscle) | 256 <sup>a</sup>  | 251 <sup>a</sup>  | 221 <sup>b</sup>  | 208 <sup>b</sup>  | 200 <sup>b</sup>  | 9.3   | < 0.001 | < 0.001 | 0.498 |
| n6/n3                                   | 11.8 <sup>b</sup> | 12.9 <sup>b</sup> | 13.7 <sup>b</sup> | 11.6 <sup>b</sup> | 17.8 <sup>b</sup> | 0.70  | 0.006   | < 0.001 | 0.023 |
| Atherogenicity index <sup>4</sup>       | 0.61 <sup>d</sup> | 0.72 <sup>c</sup> | 0.77 <sup>c</sup> | 0.89 <sup>b</sup> | 1.06 <sup>a</sup> | 0.031 | < 0.001 | < 0.001 | 0.617 |
| Thrombogenicity index <sup>5</sup>      | 1.38 <sup>d</sup> | 1.64 <sup>c</sup> | 1.72 <sup>c</sup> | 1.98 <sup>b</sup> | 2.52 <sup>a</sup> | 0.070 | < 0.001 | < 0.001 | 0.676 |

DM = dry matter; SEM = standard error of the mean; SFAs = saturated fatty acids; UFAs = unsaturated fatty acids.

<sup>a-d</sup> Values within a row with no common superscripts differ significantly ( $p < 0.05$ ).

1 Linear, linear effect of tributyrin; Quadratic, quadratic effect of tributyrin.

2 Monounsaturated fatty acids including C14:1, C15:1, C16:1, C17:1, C20:1, C18:1n9t, C18:1n9c and C24:1.

3 Polyunsaturated fatty acids including C18:2n6t, C18:2n6c, C18:3n6, C20:2, C18:3n3, C18:3n6 and C22:6n3.

4 Atherogenicity index =  $(12:0 + 4 \times 14:0 + 16:0) / (\text{MUFA} + \text{PUFA})$  calculated according to Ulbricht and Southgate (1991).

5 Thrombogenicity index =  $(12:0 + 16:0 + 18:0) / [(0.5 \times \text{MUFA}) + (0.5 \times \text{n-6 PUFA}) + (3 \times \text{n-3 PUFA}) + (\text{n-3 PUFA}/\text{n-6 PUFA})]$  calculated according to Ulbricht and Southgate (1991).
